# Supplementary material for: Transpiration in an oil palm landscape: effects of palm age
Source: Copernicus journal article supplement (doi:10.5194/bg-12-5619-2015), 2015-10-05
Supplement: Supplementary file 1 [file bg-12-5619-2015-supplement.zip]

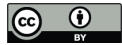

## *Supplement of*

# **Transpiration in an oil palm landscape: effects of palm age**

**A. Röhl et al.**

*Correspondence to:* A. Röhl (aroell@gwdg.de)

- bg-12-5619-2015-supplement-title-page.pdf
- BO2.csv
- BO3.csv
- BO4.csv
- BO5.csv
- Eddy covariance.csv
- HAR\_old.csv
- HAR\_yg.csv
- HO1.csv
- HO2.csv
- HO3.csv
- HO4.csv
- PA.csv
- PK\_old.csv
- PK\_yg.csv
- PTHI.csv
- PTPN.csv

The copyright of individual parts of the supplement might differ from the CC-BY 3.0 licence.
